# Supplementary material for: Dissecting Colistin Resistance Mechanisms in Extensively Drug-Resistant Acinetobacter baumannii Clinical Isolates
Source: PubMed Central journal article supplement (PMC6635527; doi:10.1128/mbio.01083-19), 2019-07-16
Supplement: mBio.01083-19-sf002.pdf [file mBio.01083-19-sf002.pdf]

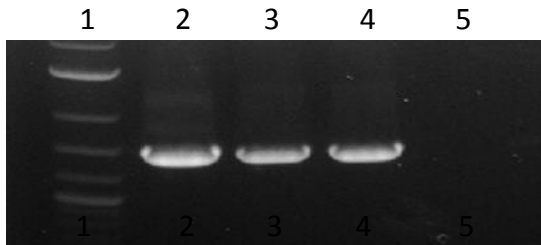

**Fig S2: Gel agarose of *eptA* genotyping in the clinical isolate BV94 and its *eptA* knockout mutants.**

The genotyping of *eptA* isoforms was performed by PCR using primers oVT152/oVT153. Lane 1: 2-log ladder (New England Biolabs), lane 2: BV94, lane 3: BV94 <sub>$\Delta$ eptA-1</sub>, lane 4: BV94 <sub>$\Delta$ eptA-1/ $\Delta$ eptA-2</sub>, lane 5: BV94 <sub>$\Delta$ eptA-1/ $\Delta$ eptA-2/ $\Delta$ eptA-3</sub>. The triple mutant BV94 <sub>$\Delta$ eptA-1/ $\Delta$ eptA-2/ $\Delta$ eptA-3</sub> did not encode any other *eptA* isoform.
