# Supplementary material for: Dissecting Colistin Resistance Mechanisms in Extensively Drug-Resistant Acinetobacter baumannii Clinical Isolates
Source: PubMed Central journal article supplement (PMC6635527; doi:10.1128/mbio.01083-19), 2019-07-16
Supplement: mBio.01083-19-st001.pdf [file mBio.01083-19-st001.pdf]

**Table S1: Oligonucleotides used in this study**

| Oligo name | Sequence (5'-3')                             |
|------------|----------------------------------------------|
| oVT8       | GTTTTCCCAGTCACGACGC                          |
| oVT14      | TGAGGTGCCCAAATCAGTC                          |
| oVT49      | GGAATCCGGTTACCAAGTGACTTGG                    |
| oVT50      | CGAAATTTAAATCCCCGGGGAGTTCTAGGCTCGCTTTAGTTTAC |
| oVT51      | CTCCCCGGGGGATTTAAATTTTCGGGACTTC              |
| oVT52      | CGGATCCGTCGTAATTCATGAGCAGC                   |
| oVT91      | CGGGTATGCCACGTGTAGAT                         |
| oVT92      | CAAATGCTGAATACGCGCCA                         |
| oVT152     | AGTTCTTTTCTTAGGGGCGACA                       |
| oVT153     | ACATTGGCTCAACATATCAAGTTTGT                   |
| oVT162     | CCATTTGGCTAGGTGCAATTT                        |
| oVT163     | ACCGCATAATAGGTAGCAACA                        |
| oVT164     | TGCTTTTATCTATCTGGCTAGGTT                     |
| oVT165     | TGTCGCCCTAAGAAAAGAACT                        |
| oVT174     | ACCCAGCATGATATTCCGGA                         |
| oVT198     | CTCAAGGAGCCATCGTCATAT                        |
| oVT199     | GGGTTACGACTGCCCTCTTA                         |
| oVT201     | AGTTTTACTAGCTAAGATTTTCGAG                    |
| oVT202     | TGATGCATAGCTGACGAAG                          |
| oVT235     | GGAGAATTGAGGCCTCTCGAGCATTACAGGTGTTGCTGTG     |
| oVT236     | CCCTTTACCCGGGATATGACGATGGCTCCTTG             |
| oVT237     | TCGTCATATCCCGGGTAAGAGGGCAGTCGTAACC           |
| oVT238     | AGCTTCCTGCAGGCTCTAGAAATGGGGGCTTCTGG          |
| oVT242     | AGCTTCCTGCAGGCTCTAGACGCCCTTGGTCTCCTAAC       |
| oVT243     | TATGGACAAGAAGAAGGCG                          |
| oVT244     | ACAGCTTGGCCATAGGAAGC                         |
| oVT246     | GCTTTTGTGAAGTTGGGGCC                         |
| oVT305     | GGAGAATTGAGGCCTCTCGAGACGATTGCGAGCATCAGG      |
| oVT306     | ACGAAGGTCCCGGGCGAAACATCGGTCTGCAC             |
| oVT307     | GATGTTTCGCCCGGGACCTTCGTCAGCTATGCATC          |
| oVT311     | ATGTA AACCACTGCTCACCG                        |
| oVT314     | TGGCAAAGGTGTGCTATTGC                         |
| oVT315     | ATTTGGCAGCAGCAGTTTCC                         |
| oVT324     | AATTCGAGCTCGGTACCAGAGTTCTGCTTCAGCTC          |
| oVT325     | CTCGCTTTACCCGGGAAACAGGGAAATCTGTTTATTTTC      |
| oVT326     | CCCTGTTTCCCGGGTAAAGCGAGCCTAGAACATG           |
| oVT327     | CGCAAGCTTCCTGCAGATTGAGGTGCCCAAATC            |
| oVT328     | TCGACAAACATTGGTGGTGG                         |
| oVT340     | AGCGGTTTCTGTGCCATGTA                         |
| oVT341     | CCGCGTTTGATTGTTCTGCA                         |
| oVT342     | TACAGGGCTGTTTCGAAACT                         |
| oVT343     | GCAGGTCCATGACTACCCAC                         |
| oVT344     | TGCAGAACAAATCAAACGCGG                        |
| oVT345     | CCGACCACTGCAAATGAAGC                         |
| oVT390     | AGAATTGAGGCCTCTCGAGGAATTCATATGTGTTGTGGTCTGGG |
| oVT391     | TGGGATTTTTCCCGGGACCCACAAAATCTCTTTTC          |
| oVT392     | TTTGTGGGTCCCGGGAAAAATCCCACCGAAGTG            |
| oVT393     | CCGCAAGCTTCCTGCAGGCTCTAGAAAACGTGCTCAAAGTGC   |
| oVT396     | TAAATCCTGGCACTTGGTGG                         |
| oVT397     | CCGGTGGTATGGAGTCGATG                         |
| oCK292     | GGACAGGCTGGGTCGTTTG                          |
| rpoD-qRT-F | GAGTCTAATGGCGGTGGTTC                         |
| rpoD-qRT-R | ATTGCTTCATCTGCTGGTTG                         |
